1 **The FlhA linker mediates flagellar protein export switching**  
2 **during flagellar assembly**

3

4 **Yumi Inoue<sup>1,†</sup>, Mamoru Kida<sup>2</sup>, Miki Kinoshita<sup>1</sup>, Norihiro Takekawa<sup>2</sup>,**  
5 **Keiichi Namba<sup>1,3,4</sup>, Katsumi Imada<sup>2,\*</sup> and Tohru Minamino<sup>1,\*</sup>**

6

7 <sup>1</sup> Graduate School of Frontier Biosciences, Osaka University, 1-3 Yamadaoka, Suita,  
8 Osaka 565-0871, Japan

9 <sup>2</sup> Department of Macromolecular Science, Graduate School of Science, Osaka University,  
10 1-1 Machikaneyama-cho, Toyonaka, Osaka 560-0043, Japan

11 <sup>3</sup> RIKEN Spring-8 Center and Center for Biosystems Dynamics Research, 1-3  
12 Yamadaoka, Suita, Osaka 565-0871, Japan

13 <sup>4</sup> JEOL YOKOGUSHI Research Alliance Laboratories, Osaka University, 1-3 Yamadaoka,  
14 Suita, Osaka 565-0871, Japan

15

16 †Present address: Department of Ophthalmology and Visual Sciences, Kyoto University  
17 Graduate School of Medicine, Kyoto, 606-8507 Japan

18

19 \*Correspondence to Tohru Minamino : Mailing address, Graduate School of Frontier  
20 Biosciences, Osaka University, 1-3 Yamadaoka, Suita, Osaka 565-0871, Japan. Tel:  
21 +81-6-6879-4625; E-mail: [tohru@fbs.osaka-u.ac.jp](mailto:tohru@fbs.osaka-u.ac.jp) or Katsumi Imada: Graduate School  
22 of Sciences, Osaka University, 1-1 Machikaneyama, Toyonaka, Osaka 560-0043, Japan.  
23 Tel: +81-6-6850-5455; E-mail: [kimada@chem.sci.osaka-u.ac.jp](mailto:kimada@chem.sci.osaka-u.ac.jp).

24

25 **Abstract**

26 **The flagellar protein export apparatus switches export specificity from hook-type**  
27 **to filament-type upon completion of hook assembly, thereby initiating filament**  
28 **assembly at the hook tip. The C-terminal cytoplasmic domain of FlhA (FlhA<sub>C</sub>) forms**  
29 **a homo-nonameric ring structure that serves as a docking platform for flagellar**  
30 **export chaperones in complex with their cognate filament-type substrates.**  
31 **Interactions of the flexible linker of FlhA (FlhA<sub>L</sub>) with its nearest FlhA<sub>C</sub> subunit in**  
32 **the ring allow the chaperones to bind to FlhA<sub>C</sub> to facilitate filament-type protein**  
33 **export, but it remains unclear how it occurs. Here, we report that FlhA<sub>L</sub> acts as a**  
34 **switch that brings the order to flagellar assembly. The crystal structure of**  
35 **FlhA<sub>C</sub>(E351A/D356A) showed that Trp-354 in FlhA<sub>L</sub> bound to the**  
36 **chaperone-binding site of its neighboring subunit. We propose that FlhA<sub>L</sub> binds to**  
37 **the chaperone-binding site of FlhA<sub>C</sub> to suppress the interaction between FlhA<sub>C</sub> and**  
38 **the chaperones until hook assembly is completed.**

39

## 40 **Introduction**

41 The flagellum of *Salmonella enterica* (hereafter referred to *Salmonella*) is a  
42 supramolecular motility machine consisting of the basal body, the hook and the filament.  
43 For construction of the flagella on the cell surface, a type III protein export apparatus  
44 (FT3SS) transports flagellar building blocks from the cytoplasm to the distal end of the  
45 growing flagellar structure. The FT3SS is divided into three structural parts: a  
46 transmembrane export gate complex made of FlhA, FlhB, FliP, FliQ and FliR, a docking  
47 platform composed of the cytoplasmic domains of FlhA and FlhB (FlhA<sub>C</sub> and FlhB<sub>C</sub>), and  
48 a cytoplasmic ATPase ring complex consisting of FliH, FliI and FliJ<sup>1</sup>. The FlhA<sub>C</sub>-FlhB<sub>C</sub>  
49 docking platform switches its substrate specificity from hook-type export substrates (FlgD,  
50 FlgE and FliK) to filament-type ones (FlgK, FlgL, FlgM, FliC and FliD) when the hook  
51 reaches its mature length of about 55 nm in *Salmonella*, thereby terminating hook  
52 assembly and initiating filament formation<sup>2</sup>.

53 FliK is secreted via FT3SS during hook-basal body (HBB) assembly not only to  
54 measure the hook length but also to switch export specificity of the FlhA<sub>C</sub>-FlhB<sub>C</sub> docking  
55 platform<sup>2</sup>. This has been recently verified by *in vitro* reconstitution experiments using  
56 inverted membrane vesicles<sup>3,4</sup>. The N-terminal domain of FliK (FliK<sub>N</sub>) serves as a  
57 secreted molecular ruler to measure the hook length<sup>5-8</sup>. When the hook length reaches  
58 about 55 nm, a flexible linker region of FliK connecting FliK<sub>N</sub> and the C-terminal domain  
59 (FliK<sub>C</sub>) promotes a conformational rearrangement of FliK<sub>C</sub> to interact with FlhB<sub>C</sub>, thereby

60 terminating hook-type protein export<sup>9,10</sup>.

61 FlhA<sub>C</sub> consists of four domains, D1, D2, D3 and D4, and a flexible linker (FlhA<sub>L</sub>)  
62 connecting FlhA<sub>C</sub> with the N-terminal transmembrane domain of FlhA (Fig. 1)<sup>11</sup>. FlhA<sub>C</sub>  
63 forms a homo-nonamer ring<sup>12,13</sup> and provides binding-sites for flagellar export chaperons  
64 (FlgN, FliS and FliT) in complex with their cognate filament-type substrates<sup>14–17</sup>.  
65 Interactions of FlhA<sub>C</sub> with the flagellar chaperones facilitate the filament-type substrates  
66 to enter into the export gate complex for efficient protein export and assembly<sup>15,16</sup>. The  
67 FliK<sub>C</sub>-FlhB<sub>C</sub> interaction is thought to induce structural remodeling of the FlhA<sub>C</sub> ring  
68 through interactions of FlhA<sub>L</sub> with its nearest FlhA<sub>C</sub> subunit, thereby initiating the export of  
69 filament-type proteins<sup>13,18,19</sup>. However, it remains unknown how.

70 In the present study, to clarify the role of FlhA<sub>L</sub> in the export switching  
71 mechanism of FT3SS, we analyzed the interaction between FlhA<sub>L</sub> and FlhA<sub>C</sub> and provide  
72 evidence suggesting that the interaction of FlhA<sub>L</sub> with the chaperone-binding site of FlhA<sub>C</sub>  
73 inhibits the binding of the flagellar export chaperones to FlhA<sub>C</sub> to keep the export  
74 specificity in the hook type during hook assembly.

75

## 76 **Results**

77 **Isolation of pseudorevertants from the *flhA(E351A/W354A/D356A)* mutant.** Glu-351,  
78 Trp-354 and Asp-356 of FlhA<sub>L</sub> bind to the D1 and D3 domains of its neighboring FlhA<sub>C</sub>

79 subunit to stabilize FlhA<sub>C</sub> ring structure in solution<sup>11,13</sup>. The *flhA(E351A/D356A)* and  
80 *flhA(W354A)* mutants produces the HBBs without the filament attached although their  
81 hook length is not controlled properly<sup>13</sup>. The W354A and E351A/D356A mutations inhibit  
82 the interaction of FlhA<sub>C</sub> with flagellar chaperones in complex with their cognate  
83 filament-type substrates, suggesting that the interaction between FlhA<sub>L</sub> and the D1 and  
84 D3 domains of its neighboring FlhA<sub>C</sub> subunit keeps the chaperone binding site of FlhA<sub>C</sub>  
85 open to allow the chaperones to bind to FlhA<sub>C</sub> to facilitate the export of the filament-type  
86 substrates<sup>13</sup>. However, the *flhA(E351A/W354A/D356A)* mutant do not produce the HBBs  
87 at all, raising a question of why the E351A/W354A/D356A triple mutation inhibits HBB  
88 assembly<sup>13</sup>. To clarify this question, we isolated 14 pseudorevertants from the  
89 *flhA(E351A/W354A/D356A)* mutant. Motility was somewhat restored by these  
90 pseudorevertant mutations but it was much poorer than that of wild-type cells (Fig. 2a).  
91 Export substrates such as FlgD, FlgE, FlgK and FliD were detected in the culture  
92 supernatants of these pseudorevertants (Fig. 2b). In agreement with this, these  
93 pseudorevertants produced a couple of flagella on the cell surface (Fig. 2c). DNA  
94 sequencing revealed that all suppressor mutations are located in the *flgMN* operon. One  
95 was the M1I mutation at the start codon of the *flgM* gene (isolated twice), presumably  
96 inhibiting FlgM translation. Two suppressor mutations produced a stop codon at position  
97 of Gln-52 or Ser-85 of FlgM, resulting in truncation of the C-terminal region of FlgM. Nine  
98 suppressor mutations were large deletions in *flgM*. We also found that there was a large

99 deletion in the *flgM* and *flgN* genes, thereby disrupting both FlgM and FlgN. A  
100 loss-of-function of FlgM results in a considerable increment in the transcription levels of  
101 flagellar genes<sup>20,21</sup>. Consistently, the cellular levels of FlgK and FliD seen in the  
102 pseudorevertants were higher than those in its parental strain (Fig. 2b, 3rd and 4th rows).  
103 It has been shown that an interaction between FliJ and FlhA<sub>L</sub> brought about by FliH and  
104 FliI fully activates the transmembrane export gate complex of  $\sigma^{54}$  to utilize proton  
105 motive force (PMF) across the cell membrane to drive flagellar protein export<sup>22</sup>. Because  
106 the E351A/W354A/D356A triple mutation reduces the binding affinity of FlhA<sub>C</sub> for FliJ<sup>13</sup>,  
107 this suggests that these *flgM* mutations considerably increase the cytoplasmic levels of  
108 FliH, FliI, FliJ and export substrates to allow the *flhA(E351A/W354A/D356A)* mutant to  
109 export flagellar building blocks for producing a small number of flagella on the cell  
110 surface. Therefore, we propose that Glu-351, Trp-354 and Asp-356 of FlhA<sub>L</sub> also play an  
111 important role in the activation mechanism of the PMF-driven export gate complex.

112 We found that the secretion levels of FlgD and FlgE by the pseudorevertants  
113 were about 1.5-fold and 4-fold higher than those by the wild-type whereas the secretion  
114 levels of FlgK and FliD were much lower (Fig. 2b), raising the possibility that *flgM*  
115 suppressor mutations do not efficiently promote export switching of  $\sigma^{54}$  from  
116 hook-type substrates to filament-type ones in the *flhA(E351A/W354A/D356A)* mutant. To  
117 clarify this, we introduced the  $\Delta flgM::km$  allele to the *Salmonella* NH001 ( $\Delta flhA$ ) strain to  
118 produce the  $\Delta flgM::km$  and *flhA(E351A/W354A/D356A)*  $\Delta flgM::km$  cells (Supplementary

119 **Fig. 1).** The  $\Delta flgM::km$  allele restored motility of the  $flhA(E351A/W354A/D356A)$  mutant in  
120 a way similar to other  $flgM$  suppressor mutations. Then, we isolated flagella from the  
121  $\Delta flgM::km$  and  $flhA(E351A/W354A/D356A) \Delta flgM::km$  cells and measured their hook  
122 length. The hook length of the  $\Delta flgM::km$  strain was  $52.0 \pm 5.1$  nm (mean  $\pm$  SD,  $n = 157$ )  
123 (**Fig. 2d**), which is nearly the same as that of the wild-type strain ( $51.0 \pm 6.9$  nm)<sup>13</sup>. This  
124 indicates that the loss-of-function mutation of FlgM does not affect the hook length  
125 control. In contrast, the average hook length of the  $flhA(E351A/W354A/D356A)$   
126  $\Delta flgM::km$  strain was  $68.8 \pm 30.9$  nm (mean  $\pm$  SD,  $n = 157$ ) (**Fig. 2d**), indicating that the  
127 hook length control becomes worse in the presence of the E351A/W354A/D356A triple  
128 mutation. These suggest that this triple mutation affects not only the initiation of  
129 filament-type protein export but also the termination of hook-type protein export.  
130 Therefore, we propose that conformational rearrangements of FlhA<sub>L</sub> are required for  
131 well-regulated export switching of FT3SS.

132

133 **Effect of FlhA linker mutations on the hydrodynamic properties of FlhA<sub>C</sub> in**  
134 **solution.** A well conserved hydrophobic dimple of FlhA<sub>C</sub> containing Asp-456, Phe-459  
135 and Thr-490 residues is located at the interface between domains D1 and D2 and is  
136 involved in the interactions with the FlgN, FliS and FliT chaperones in complex with their  
137 cognate filament-type substrates (**Fig. 1**)<sup>15-17</sup>. The W354A, E351A/D356A and  
138 E351A/W354A/D356A mutations significantly reduce the binding affinity of FlhA<sub>C</sub> for

139 these chaperone/substrate complexes<sup>13</sup>, raising the possibility that FlhA<sub>L</sub> carrying these  
140 *flhA* mutations binds to the hydrophobic dimple of FlhA<sub>C</sub> and blocks the FlhA<sub>C</sub>-chaperone  
141 interaction. If true, FlhA<sub>C</sub> with these mutations would show distinct hydrodynamic  
142 properties compared with wild-type FlhA<sub>C</sub>. To clarify this possibility, we performed size  
143 exclusion chromatography with a Superdex 75 column HR 10/30 column. Wild-type  
144 His-FlhA<sub>C</sub> appeared as a single peak at an elution volume of 10.3 mL, which corresponds  
145 to the deduced molecular mass of His-FlhA<sub>C</sub> (about 43 kDa) (Fig. 3a). His-FlhA<sub>C</sub>(W354A),  
146 His-FlhA<sub>C</sub>(E351A/D356A) and His-FlhA<sub>C</sub>(E351A/W354A/D356A) appeared as a single  
147 peak at an elution volume of 10.3 mL, 10.5 mL and 10.4 mL, respectively (Fig. 3a),  
148 indicating that these mutant variants exist as a monomer in solution.  
149 His-FlhA<sub>C</sub>(E351A/D356A) exhibited a slightly delayed elution behavior compared with the  
150 wild-type. Furthermore, His-FlhA<sub>C</sub>(E351A/D356A) showed a slightly faster mobility on  
151 SDS-PAGE gels. Far-UV CD measurements revealed that the E351A/D356A double  
152 mutation did not affect the secondary structures of FlhA<sub>C</sub> (Supplementary Fig. 2). These  
153 suggest that FlhA<sub>C</sub>(E351A/D356A) adopts a more compact conformation than wild-type  
154 FlhA<sub>C</sub>. The elution peak position of His-FlhA<sub>C</sub>(E351A/W354A/D356A) was between those  
155 of the wild-type and FlhA<sub>C</sub>(E351A/D356A) (Fig. 3a). Because  
156 His-FlhA<sub>C</sub>(E351A/W354A/D356A) showed two different bands on SDS-PAGE gels, with a  
157 slower mobility band corresponding to wild-type FlhA<sub>C</sub> and a faster one corresponding to  
158 FlhA<sub>C</sub>(E351A/D356A) (Fig. 3a, inset), we suggest that FlhA<sub>C</sub>(E351A/W354A/D356A)



159 exists in an equilibrium between the wild-type conformation and the compact  
160 conformation. Since FlhA<sub>C</sub>(W354A) adopted the wild-type conformation (Fig. 3a), we  
161 suggest that the E351A/D356A double mutation is required to make FlhA<sub>C</sub> more compact  
162 and that Trp-354 of FlhA<sub>L</sub> is needed to stabilize the compact conformation.

163

164 **Effect of FlhA linker mutations on methoxypolyethylene glycol 5000 maleimide**  
165 **(mPEG-maleimide) modifications of Cys-459 and Cys-548.** FlhA<sub>C</sub> structures have  
166 shown that it adopts three distinct, open, semi-closed and closed  
167 conformations<sup>11,14,17,18,23</sup>. Phe-459 and Lys-548 are fully exposed to solvent on the  
168 molecular surface of the open conformation of FlhA<sub>C</sub> but are in close proximity to each  
169 other in the closed conformation<sup>11,18,23</sup>. To test whether mutations in FlhA<sub>L</sub> bias FlhA<sub>C</sub>  
170 towards the closed structure, we performed Cys modification experiments with  
171 mPEG-maleimide, which adds a molecular mass of ~5 kDa to a target protein.  
172 FlhA<sub>C</sub>(F459C/K548C) modified by mPEG-maleimide showed much slower mobility shift,  
173 indicating that both Cys459 and Cys548 are exposed to the solvent. The W354A,  
174 E351A/D356A and E351A/W354A/D356A mutations did not inhibit Cys modifications with  
175 mPEG-maleimide at all, indicating that FlhA<sub>C</sub> with these mutations does not adopt the  
176 closed conformation.

177

178 **Crystal structure of FlhA<sub>C</sub>(E351A/D356A).** To investigate whether Trp-354 of FlhA<sub>L</sub>

179 binds to the hydrophobic dimple of FlhA<sub>C</sub> to makes FlhA<sub>C</sub>(E351A/D356A) more compact,  
180 we explored crystallization conditions of FlhA<sub>C</sub>(E351A/D356A) for a molecular packing  
181 distinct from the open (PDB code: 3A5I)<sup>11</sup> and semi-closed (PDB code: 6AI0)<sup>18</sup> forms of  
182 wild-type FlhA<sub>C</sub>. We found a new orthorhombic crystal that diffracted up to 2.8 Å  
183 resolution, with unit cell dimensions  $a = 71.7$  Å,  $b = 96.2$  Å,  $c = 114.1$  Å (Table 1) and the  
184 asymmetric unit containing two FlhA<sub>C</sub> molecules (A and B). Mol-A adopts an open  
185 conformation similar to the 3A5I structure whereas Mol-B shows a semi-closed  
186 conformation similar to the 6AI0 structure (Supplementary Fig. 3). The residues from  
187 Val-349 to Val-357 in FlhA<sub>L</sub> of Mol-A form an α-helix, which interacts with the hydrophobic  
188 dimple of a neighboring Mol-A molecule related by a crystallographic symmetry (Fig. 4a).  
189 Trp-354 fits into the hydrophobic dimple, and Ala-351 hydrophobically contacts with  
190 Pro-442 on the periphery of the dimple (Fig. 4b). These interactions resemble the  
191 interaction between the N-terminal α-helix of FliS and the hydrophobic dimple of FlhAc  
192 (PDB ID: 6CH3)<sup>17</sup> (Fig. 4c). Ile-7 and Tyr-10 of the N-terminal α-helix of FliS is in the  
193 corresponding position of Ala-351 and Trp-354 of FlhA<sub>L</sub>, respectively. Tyr-10 fits into the  
194 hydrophobic dimple of FlhAc, and Ile-7 interacts with Pro-442 of FlhAc (Fig. 4d). These  
195 observations suggest that FlhA<sub>L</sub> and flagellar chaperones bind competitively to a  
196 common binding site on FlhA<sub>C</sub> and that the dissociation of FlhA<sub>L</sub> from this binding site is  
197 required for the binding of the flagellar chaperones to FlhA<sub>C</sub>.

198

## 199 **Discussion**

200 The FlhA<sub>C</sub> ring serves as the docking platform for flagellar export chaperones in complex  
201 with their cognate substrates and facilitates the export of filament-type proteins to form  
202 the filament at the hook tip after completion of hook assembly<sup>14–17</sup>. The FlhA<sub>C</sub> ring also  
203 ensures the strict order of flagellar protein export, thereby allowing the huge and complex  
204 flagellar structure to be built efficiently on the cell surface<sup>13,14,16,18,19</sup>. Interactions of FlhA<sub>L</sub>  
205 with its neighboring FlhA<sub>C</sub> subunit in the nonamer ring is required for the initiation of  
206 filament-type protein export upon completion of hook assembly. However, it remained  
207 unclear how the FlhA<sub>C</sub> ring mediates such hierarchical protein export during flagellar  
208 assembly.

209 In this study, we first performed genetic analyses of the  
210 *flhA(E351A/W354A/D356A)* mutant and found that the E351A/W354A/D356A triple  
211 mutation caused a loose hook-length control (Fig. 2d), indicating that the  
212 E351A/W354A/D356A mutation significantly affects the termination of hook-type protein  
213 export. Furthermore, this triple mutation also reduced the secretion levels of the  
214 filament-type proteins considerably (Fig. 2b), thereby reducing the number of flagellar  
215 filaments per cell (Fig. 2c). These results suggest that FlhA<sub>L</sub> serves as a structural switch  
216 for substrate specificity switching of FT3SS from hook-type to filament-type and that  
217 Glu-351, Trp-354 and Asp-356 of FlhA<sub>L</sub> are directly involved in this export switching  
218 mechanism.

219           It has been reported that the W354A, E351A/D356A and E351A/W354A/D356A  
220 mutations inhibit interactions between FlhA<sub>C</sub> and flagellar chaperones in complex with  
221 their cognate filament-type substrates<sup>13</sup>, suggesting that FlhA<sub>L</sub> regulates the binding of  
222 flagellar chaperones to FlhA<sub>C</sub>. The crystal structure of FlhA<sub>C</sub>(E351A/D356A) showed that  
223 Trp-354 of one Mol-A molecule bound to the hydrophobic dimple of the flagellar  
224 chaperone binding site of its nearest Mol-A in the crystal (Fig. 4). Although the relative  
225 orientations of these Mol-A molecules in the crystal differs from those in the FlhA<sub>C</sub>  
226 nonameric ring, FlhA<sub>L</sub> can bind to the hydrophobic dimple of FlhA<sub>C</sub> in the nonamer ring  
227 structure because of a highly flexible nature of FlhA<sub>L</sub> (Fig. 5). The C-terminal region of  
228 FlhA<sub>L</sub> is flexible enough to allow such subunit orientations without changing the essential  
229 interaction between FlhA<sub>L</sub> and the chaperone binding site of FlhA<sub>C</sub>, as it has been shown  
230 to have various conformations in the known FlhAc structures<sup>18</sup>. Therefore, we propose  
231 that an interaction between FlhA<sub>L</sub> and the hydrophobic dimple of its neighboring FlhA<sub>C</sub>  
232 subunit suppresses the docking of flagellar chaperones to the FlhA<sub>C</sub> ring platform during  
233 HBB assembly and that the hook completion induces the detachment of FlhA<sub>L</sub> from the  
234 dimple through an interaction between FliK<sub>C</sub> and FlhB<sub>C</sub> and its attachment to the D1 and  
235 D3 domains to induce structural remodeling of the FlhA<sub>C</sub> ring, thereby terminating hook  
236 assembly and initiating filament formation (Fig. 5). Because Trp-354 of FlhA<sub>L</sub> stabilized a  
237 more compact conformation of the FlhA<sub>C</sub>(E351A/D356A) monomer compared to the  
238 wild-type FlhA<sub>C</sub> and FlhA<sub>C</sub>(W354A) monomers (Fig. 3), it is also possible that FlhA<sub>L</sub> may

239 block the docking of the flagellar chaperones to FlhA<sub>C</sub> by covering the binding site of the  
240 same FlhA<sub>C</sub> molecule.

241

## 242 **Methods**

243 **Bacterial strains and plasmids.** Bacterial strains and plasmids used in this study are  
244 listed in [Supplementary Table 1](#).

245

246 **DNA manipulations.** DNA manipulations and site-directed mutagenesis were carried out  
247 as described previously<sup>24</sup>. DNA sequencing reactions were carried out using BigDye v3.1  
248 (Applied Biosystems) and then the reaction mixtures were analyzed by a 3130 Genetic  
249 Analyzer (Applied Biosystems).

250

251 **Motility assays.** Fresh colonies were inoculated into soft agar plates [1% (w/v) triptone,  
252 0.5% (w/v) NaCl, 0.35% Bacto agar] and incubated at 30°C.

253

254 **Secretion assays.** Details of sample preparations have been described previously<sup>25</sup>.  
255 After SDS-polyacrylamide gel electrophoresis (PAGE), immunoblotting with polyclonal  
256 anti-FlgD, anti-FlgE, anti-FlgK, or anti-FliD antibody was carried out as described  
257 previously<sup>26</sup>.

258

259 **Hook length measurements.** The HBBs were purified from NH004gM carrying pMM130  
260 or pYI003 as described previously<sup>27</sup>. The HBBs were negatively stained with 2%(w/v)  
261 uranyl acetate. Electron micrographs were recorded with a JEM-1011 transmission  
262 electron microscope (JEOL, Tokyo, Japan) operated at 100 kV and equipped with a F415  
263 CCD camera (TVIPS, Gauting, Germany). Hook length was measured by ImageJ version  
264 1.48 (National Institutes of Health).

265

266 **Protein purification.** *E. coli* BL21 (DE) Star cells carrying a pET15b-based plasmid  
267 encoding His-FlhA<sub>C</sub> or its mutant variants were grown overnight at 30°C in 250 mL of  
268 L-broth [1% (w/v) tryptone, 0.5% (w/v) yeast extract, 0.5% (w/v) NaCl] containing  
269 ampicillin. His-FlhA<sub>C</sub> and its mutant variants were purified by affinity chromatography,  
270 followed by size exclusion chromatography as described previously<sup>24</sup>.

271

272 **Far-UV CD spectroscopy.** Far-UV CD spectroscopy of His-FlhA<sub>C</sub> or its mutant variants  
273 was carried out at room temperature using a Jasco-720 spectropolarimeter (JASCO  
274 International Co., Tokyo, Japan) as described previously<sup>28</sup>.

275

276 **Cystein modification by mPEG-maleimide.** His-FlhA<sub>C</sub>(F459C), His-FlhA<sub>C</sub>(K548C),  
277 His-FlhA<sub>C</sub>(F459C/K548C), His-FlhA<sub>C</sub>(W354A/F459C/K548C),

278 His-FlhA<sub>C</sub>(E351A/D356A/F459C/K548C) and  
279 His-FlhA<sub>C</sub>(E351A/W354A/D356A/F459C/K548C) were dialyzed overnight against PBS (8  
280 g of NaCl, 0.2 g of KCl, 3.63 g of Na<sub>2</sub>HPO<sub>4</sub> 12H<sub>2</sub>O, 0.24 g of KH<sub>2</sub>PO<sub>4</sub>, pH 7.4 per liter) at  
281 4°C, followed by cysteine modification by mPEG-maleimide (Fluka) as described  
282 previously<sup>18</sup>. Each protein solution was run on SDS-PAGE and then analyzed by  
283 Coomassie Brilliant blue (CBB) staining.

284

285 **X-ray crystallographic study of FlhA<sub>C</sub>(E351A/D356A).** Initial crystallization screening  
286 was performed at 20°C by the sitting-drop vapor-diffusion method using Wizard Classic I  
287 and II, Wizard Cryo I and II (Rigaku Reagents, Inc.), Crystal Screen and Crystal Screen 2  
288 (Hampton Research). Crystals suitable for X-ray analysis were obtained from drops  
289 prepared by mixing 0.5 µL protein solution with 0.5 µL reservoir solution containing 0.1 M  
290 Tris-HCl (pH 8.5), 20% (v/v) PEG 8000, and 200 mM MgCl<sub>2</sub>. X-ray diffraction data were  
291 collected at synchrotron beamline BL41XU in SPring-8 (Harima, Japan) with the approval  
292 of the Japan Synchrotron Radiation Research Institute (JASRI) (Proposal No.  
293 2016B2544 and 2018A2568). The FlhA<sub>C</sub>(E351A/D356A) crystal was soaked in a solution  
294 containing 90% (v/v) of the reservoir solution and 10% (v/v) glycerol for a few seconds  
295 and was directly transferred into liquid nitrogen for freezing. The X-ray diffraction data  
296 were collected under nitrogen gas flow at 100 K. The diffraction data were processed

297 with MOSFLM<sup>29</sup> and were scaled with Aimless<sup>30</sup>. The initial phase was determined by  
298 molecular replacement using the software package Phenix<sup>31</sup> with the wild-type FlhAc  
299 structure in the orthorhombic crystal form (PDB code: 6AI0) as a search model. The  
300 atomic model was constructed with COOT<sup>32</sup> and refined with Phenix<sup>31</sup>. During the  
301 refinement process, iterative manual modification was performed. The diffraction data  
302 statistics and refinement statistics are summarized in [Table 1](#).

303

#### 304 **Accession code**

305 The atomic coordinates have been deposited in Protein Data Bank under the accession  
306 code 7CTN.

307

#### 308 **References**

- 309 1. Minamino, T., Kawamoto, A., Kinoshita, M. & Namba, K. Molecular organization and  
310 assembly of the export apparatus of flagellar type III secretion systems. *Curr. Top*  
311 *Microbiol. Immunol.* **427**, 91–107 (2020).
- 312 2. Minamino, T. Hierarchical protein export mechanism of the bacterial flagellar type III  
313 protein export apparatus. *FEMS Microbiol. lett.* **365**, fny117 (2018).
- 314 3. Terashima, H. *et al.* *In vitro* reconstitution of functional type III protein export and  
315 insights into flagellar assembly. *mBio* **9**, e00988-18 (2018).



- 316 4. Terashima, H. *et al.* *In vitro* autonomous construction of the flagellar axial structure in  
317 the inverted membrane vesicles. *Biomolecules* **10**, 126 (2020).
- 318 5. Minamino, T., González-Pedrajo, B., Yamaguchi, K., Aizawa, S.-I. & Macnab, R. M.  
319 FliK, the protein responsible for flagellar hook length control in *Salmonella*, is  
320 exported during hook assembly. *Mol. Microbiol.* **34**, 295–304 (1999).
- 321 6. Moriya, N., Minamino, T., Hughes, K. T., Macnab, R. M. & Namba, K. The type III  
322 flagellar export specificity switch is dependent on FliK ruler and a molecular clock. *J.*  
323 *Mol. Biol.* **359**, 466–477 (2006).
- 324 7. Shibata, S., *et al.* (2007) FliK regulates flagellar hook length as an internal ruler. *Mol.*  
325 *Microbiol.* **64**, 1404–1415.
- 326 8. Erhardt, M., Singer, H. M., Wee, D. H., Keener, J. P. & Hughes, K.T. An infrequent  
327 molecular ruler controls flagellar hook length in *Salmonella enterica*. *EMBO J.* **30**,  
328 2948–2961 (2011).
- 329 9. Kinoshita, M., Aizawa, S.I., Inoue, Y., Namba, K. & Minamino, T. The role of  
330 intrinsically disordered C-terminal region of FliK in substrate specificity switching of  
331 the bacterial flagellar type III export apparatus. *Mol. Microbiol.* **105**, 572–588 (2017).
- 332 10. Kinoshita, M., Tanaka, S., Y. Inoue, Y., Namba, K. Aizawa, S.I. & Minamino, T. The  
333 flexible linker of the secreted FliK ruler is required for export switching of the flagellar  
334 protein export apparatus. *Sci. Rep.* **10**, 838 (2020).
- 335 11. Saijo-Hamano, Y. *et al.* Structure of the cytoplasmic domain of FlhA and implication

- 336 for flagellar type III protein export. *Mol. Microbiol.* **76**, 260–268 (2010).
- 337 12. Abrusci, P. *et al.* Architecture of the major component of the type III secretion system  
338 export apparatus. *Nat. Struct. Mol. Biol.* **20**, 99–104 (2013).
- 339 13. Terahara, N. *et al.* Insight into structural remodeling of the FlhA ring responsible for  
340 bacterial flagellar type III protein export. *Sci. Adv.* **4**, eaao7054 (2018).
- 341 14. Bange G. *et al.* FlhA provides the adaptor for coordinated delivery of late flagella  
342 building blocks to the type III secretion system. *Proc. Natl. Acad. Sci. USA* **107**,  
343 11295–11300 (2010).
- 344 15. Minamino, T. *et al.* Interaction of a bacterial flagellar chaperone FlgN with FlhA is  
345 required for efficient export of its cognate substrates. *Mol. Microbiol.* **83**, 775–788  
346 (2012).
- 347 16. Kinoshita, M., Hara, N., Imada, K., Namba, K. & Minamino, T. Interactions of bacterial  
348 chaperone-substrate complexes with FlhA contribute to co-ordinating assembly of  
349 the flagellar filament. *Mol. Microbiol.* **90**, 1249–1261 (2013).
- 350 17. Xing, Q. *et al.* Structure of chaperone-substrate complexes docked onto the export  
351 gate in a type III secretion system. *Nat. Commun.* **9**, 1773 (2018).
- 352 18. Inoue, Y. *et al.* Structural insight into the substrate specificity switching mechanism of  
353 the type III protein export apparatus. *Structure* **27**, 965–976 (2019).
- 354 19. Minamino, T., Inoue, Y., Kinoshita, M. & Namba, K. FliK-driven conformational  
355 rearrangements of FlhA and FlhB are required for export switching of the flagellar

- 356 protein export apparatus. *J. Bacteriol.* **202**, e00637-19 (2020).
- 357 20. Gillen, K.L. & K.T. Hughes. Molecular characterization of *flgM*, a gene encoding a  
358 negative regulator of flagellin synthesis in *Salmonella typhimurium*. *J. Bacteriol.* **173**,  
359 6453–6459 (1991).
- 360 21. Erhardt, M., Mertens, M.E., Fabiani, F.D. & Hughes, K.T. ATPase-independent  
361 type-III protein secretion in *Salmonella enterica*. *PLoS Genet.* **10**, e1004800 (2014).
- 362 22. Minamino, T., Morimoto, Y.V., Hara, N. & Namba, K. An energy transduction  
363 mechanism used in bacterial type III protein export. *Nat. Commun.* **2**, 475 (2011).
- 364 23. Moore, S.A., and Jia, Y. Structure of the cytoplasmic domain of the flagellar secretion  
365 apparatus component FlhA from *Helicobacter pylori*. *J. Biol. Chem.* **285**, 21060–  
366 21069 (2010).
- 367 24. Saijo-Hamano, Y., Minamino, T., Macnab, R.M. & Namba, K. Structural and functional  
368 analysis of the C-terminal cytoplasmic domain of FlhA, an integral membrane  
369 component of the type III flagellar protein export apparatus in *Salmonella*. *J. Mol. Biol.*  
370 **343**, 457-466 (2004).
- 371 25. Minamino, T., Kinoshita, M. & Namba, K. Fuel of the bacterial flagellar type III protein  
372 export apparatus. *Methods Mol. Biol.* **1593**, 3–16 (2017).
- 373 26. Minamino, T. & Macnab, R. M. Components of the *Salmonella* flagellar export  
374 apparatus and classification of export substrates. *J. Bacteriol.* **181**, 1388–1394  
375 (1999).

- 376 27. Inoue, Y., Morimoto, Y. V., Namba, K. & Minamino, T. Novel insights into the  
377 mechanism of well-ordered assembly of bacterial flagellar proteins in *Salmonella*. *Sci.*  
378 *Rep.* **8**, 1787 (2018).
- 379 28. Shimada, M. *et al.* Functional defect and restoration of temperature-sensitive  
380 mutants of FlhA, a subunit of the flagellar protein export apparatus. *J. Mol. Biol.* **415**,  
381 855–865 (2012).
- 382 29. Battye, T.G., Kontogiannis, L., Johnson, O., Powell, H.R. & Leslie, A.G. ‘iMOSFLM: a  
383 new graphical interface for diffraction-image processing with MOSFLM’. *Acta*  
384 *Crystallogr. D Biol. Crystallogr.* **67**, 271–281 (2011).
- 385 30. Evans, P.R. & Murshudov, G.N. How good are my data and what is the resolution?  
386 *Acta Crystallogr. D Biol. Crystallogr.* **69**, 1204–1214 (2013).
- 387 31. Adams, P.D., *et al.* PHENIX: a comprehensive Python-based system  
388 formacromolecular structure solution. *Acta Crystallogr. D Biol. Crystallogr.* **66**, 213–  
389 221 (2010).
- 390 32. Emsley, P., Lohkamp, B., Scott, W.G. & Cowtan, K. Features and development of  
391 Coot. *Acta Crystallogr. D Biol. Crystallogr.* **66**, 486–501 (2010).

392

### 393 **Acknowledgements**

394 We thank beamline staffs at SPring-8 for technical help in use of beamlines BL41XU.

395 This work was supported in part by JSPS KAKENHI Grant Numbers JP18K14638 and

396 JP20K15749 (to M.K.), JP16J01859 (to N.T.), 25000013 (to K.N.), 15H02386 (to K.I.) and  
397 JP26293097 and JP19H03182 (to T.M.). This work has also been partially supported by  
398 JEOL YOKOGUSHI Research Alliance Laboratories of Osaka University to K.N.

399

## 400 **Author Contributions**

401 K.N. K.I. and T.M. conceived and designed research; Y.I., M.Kida, M.Kinoshita, N.T., K.I.  
402 and T.M. performed research; Y.I., M.Kida, M.Kinoshita, N.T., K.I. and T.M. analysed the  
403 data; and K.N., K.I. and T.M. wrote the paper based on discussion with other authors.

404

## 405 **Competing interests**

406 The authors declare no competing interests.

407

## 408 **Data availability**

409 All data generated during this study are included in this published article and its  
410 Supplementary Information files.

411 **Table 1. X-ray data collection and refinement statistics**

| <b>X-ray data collection</b>                          |                                                       |             |
|-------------------------------------------------------|-------------------------------------------------------|-------------|
| Space group                                           | <i>P</i> 2 <sub>1</sub> 2 <sub>1</sub> 2 <sub>1</sub> |             |
| Cell dimensions<br><i>a</i> , <i>b</i> , <i>c</i> (Å) | 71.7, 96.2, 114.1                                     |             |
| Wavelength (Å)                                        | 1.0000                                                |             |
| Resolution (Å)                                        | 73.5-2.80                                             | (2.95-2.80) |
| <i>R</i> <sub>merge</sub>                             | 0.074                                                 | (0.317)     |
| <i>R</i> <sub>pim</sub>                               | 0.065                                                 | (0.283)     |
| CC(1/2)                                               | 0.995                                                 | 0.915       |
| <i>I</i> / $\sigma$ <i>I</i>                          | 8.1                                                   | (2.8)       |
| Completeness (%)                                      | 97.1                                                  | (94.6)      |
| Redundancy                                            | 3.4                                                   | (3.1)       |
| <b>Refinement statistics</b>                          |                                                       |             |
| Resolution range (Å)                                  | 73.5-2.80                                             | (2.87-2.80) |
| No. of reflections working                            | 17,398                                                | (1,182)     |
| No. of reflections test                               | 1,903                                                 | (112)       |
| <i>R</i> <sub>w</sub> (%)                             | 23.2                                                  | (33.5)      |
| <i>R</i> <sub>free</sub> (%)                          | 29.0                                                  | (42.1)      |
| Rms deviation bond length (Å)                         | 0.003                                                 |             |
| Rms deviation Bond angle (°)                          | 0.680                                                 |             |
| B-factors                                             |                                                       |             |
| Protein atoms                                         | 70.0                                                  |             |
| Solvent atoms                                         | -                                                     |             |
| Ramachandran plot (%)                                 |                                                       |             |
| Most favored                                          | 96.0                                                  |             |
| Allowed                                               | 3.9                                                   |             |
| Disallowed                                            | 0.1                                                   |             |
| No. of protein atoms                                  | 5, 252                                                |             |
| No. of solvent atoms                                  | 0                                                     |             |

412

413 Values in parentheses are for the highest resolution shell.

414  $R_w = \sum ||F_o| - |F_c|| / \sum |F_o|$ ,  $R_{free} = \sum ||F_o| - |F_c|| / \sum |F_o|$

415

416  
417  
418  
419  
420  
421  
422  
423  
424  
425  
426  
427  
428  
429  
430  
431  
432  
433  
434  
435  
436  
437  
438

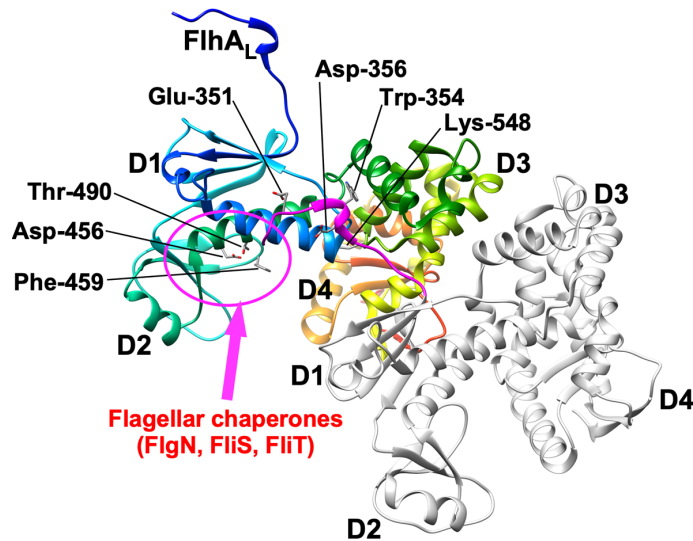

**Fig. 1. FlhA<sub>C</sub> structure in a crystal (PDB ID: 3A5I).** FlhA<sub>C</sub> consists of four domains, D1, D2, D3 and D4 and a flexible linker (FlhA<sub>L</sub>). Glu-351, Trp-354 and Asp-356 of FlhA<sub>L</sub> binds to the D1 and D3 domains of its neighboring subunit. A well-conserved hydrophobic dipole including Phe-459 is responsible for the interaction of FlhA<sub>C</sub> with flagellar export chaperones in complex with filament-type substrates. Phe-459 and Lys-548 are exposed to solvent on the molecular surface when FlhA<sub>C</sub> adopts the open conformation. The interactions between the two FlhA<sub>C</sub> molecules in this crystal also represent those in the FlhA<sub>C</sub> nonameric ring of the export apparatus.

439  
440  
441  
442  
443  
444  
445  
446  
447  
448  
449  
450  
451  
452  
453  
454  
455  
456  
457  
458  
459  
460  
461  
462  
463  
464  
465  
466

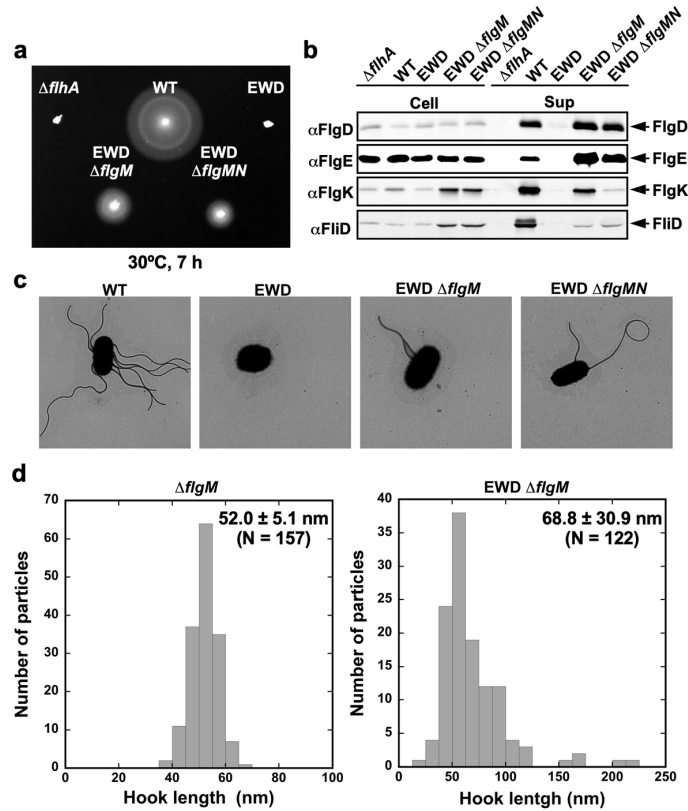

**Fig. 2. Isolation pseudorevertants from the *flhA*(E351A/W354A/D356A) mutant.** (a) Motility of the *Salmonella* NH001 strain transformed with pTrc99A ( $\Delta flhA$ ), pMM130 (WT), or pYI003 [FlhA(E351A/W354A/D356A) indicated as EWD], YI1003-4 (EWD  $\Delta flgM$ ) or YI1003-13 (EWD  $\Delta flgMN$ ) in soft agar. (b) Immunoblotting using polyclonal anti-FlgD (1st row), anti-FlgE (2nd row), anti-FlgK (3rd row) or anti-FliD (4th row) antibody, of whole cell proteins (Cell) and culture supernatants (Sup) prepared from the above strains. (c) Electron micrographs of the above cells. (d) Histogram of hook length distribution of NH001gM ( $\Delta flhA \Delta flgM::km$ ) carrying pMM130 ( $\Delta flgM$ ) or pYI003 (EWD  $\Delta flgM$ ).



467  
468  
469  
470  
471  
472  
473  
474  
475  
476  
477  
478  
479  
480  
481  
482  
483  
484  
485  
486  
487  
488  
489  
490  
491  
492  
493  
494  
495  
496  
497  
498  
499  
500  
501

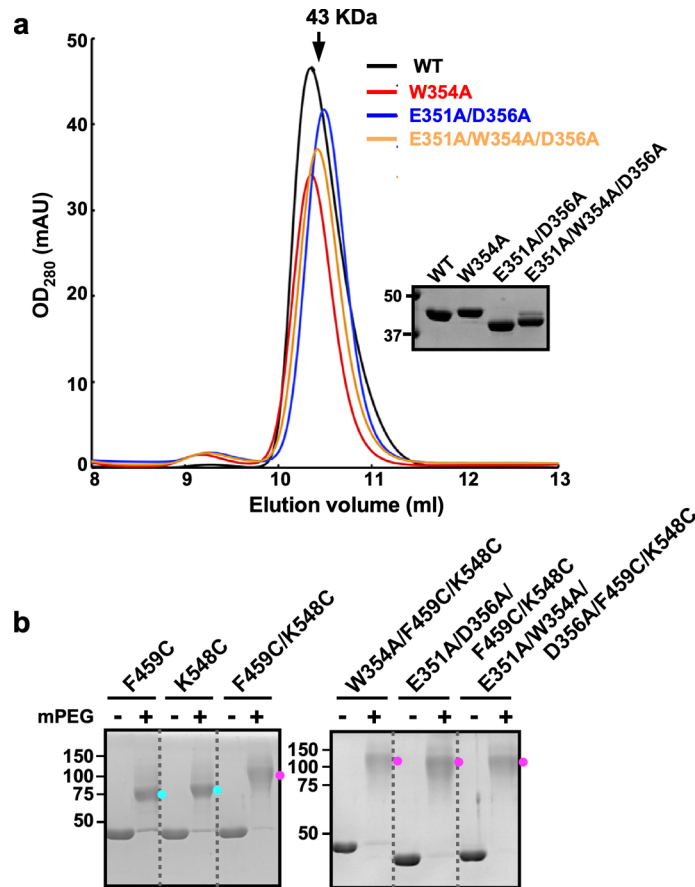

**Fig. 3. Effect of FlhA linker mutations on the FlhAc conformation.** (a) Size exclusion chromatography using a Superdex 75HR 10/30 column. Elution positions of His-FlhAc (WT, black), His-FlhAc(W354A) (red), His-FlhAc(E351A/D356A) (blue) and His-FlhAc(E351A/W354A/D356A) (orange) are 10.3 ml, 10.3 ml, 10.5 ml and 10.4 ml, respectively. Arrow indicates the elution peak of ovalbumin (43 kDa). Inset, CBB-stained gels of purified FlhAc proteins. (b) Effect of FlhA mutations on mPEG-maleimide modification of Cys459 and Cys548. His-FlhAc(F459C), His-FlhAc(K548C), His-FlhAc(F459C/K548C), His-FlhAc(W354A/F459C/K548C), His-FlhAc(E351A/D356A/F459C/K548C) and His-FlhAc(E351A/W354A/D356A/F459C/K548C) were incubated with (+) or without (-) mPEG-maleimide. After centrifugation at 20,000 g for 20 min to remove any aggregates, supernatants were analyzed by SDS-PAGE with CBB staining. Cyan and magenta dots indicate positions of FlhAc-(mPEG) and FlhAc-(mPEG)<sub>2</sub>, respectively.

502  
503  
504  
505  
506  
507  
508  
509  
510  
511  
512  
513  
514  
515  
516  
517  
518  
519  
520  
521  
522  
523  
524  
525

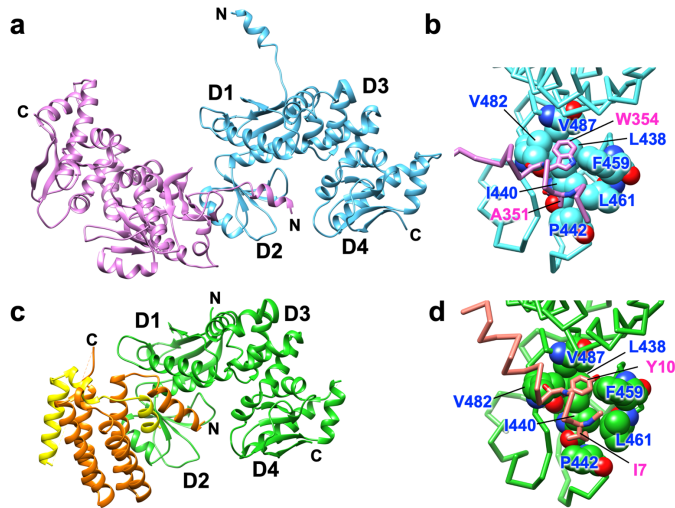

**Fig. 4. Interaction between FlhA<sub>L</sub> and a well conserved hydrophobic dimple of its neighboring FlhA<sub>C</sub> in the crystal of FlhA<sub>C</sub>(E351A/D356A).** (a) Mol-A of FlhA<sub>C</sub>(E351A/D356A) (magenta) interacts with neighboring Mol-A (cyan) related by a crystallographic symmetry. (b) Close-up view of the interaction between FlhA<sub>L</sub> and the hydrophobic dimple. Residues that form the hydrophobic dimple are indicated by balls. Ala-351 and Trp-354 in FlhA<sub>L</sub> are shown in stick models. (c) Interaction between FlhA<sub>C</sub> (green) and FliS (orange) fused with the C-terminal region of FliC (yellow) (PDB code: 6CH3). (d) Close-up view of the interaction between FliS and the hydrophobic dimple. The residues that form the hydrophobic dimple are indicated by ball. Ile-7 and Tyr-10 of FliS are shown in stick models.

526  
527  
528  
529  
530  
531  
532  
533  
534  
535  
536  
537  
538  
539  
540  
541  
542  
543  
544  
545  
546  
547  
548  
549  
550  
551  
552  
553  
554  
555

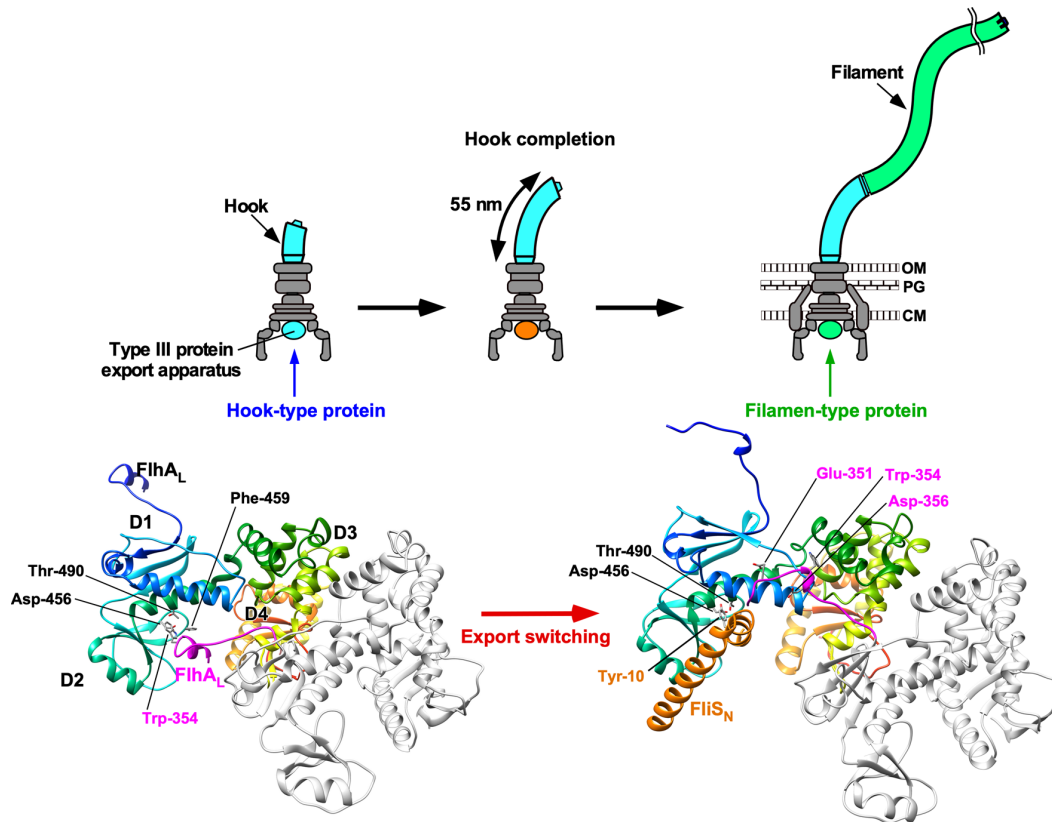

**Fig. 5. Structural rearrangements of FlhA<sub>L</sub> responsible for export switching of FT3SS.** Trp-359 of FlhA<sub>L</sub> binds to a well-conserved hydrophobic dimple containing Asp-456, Phe-459 and Thr-490 of its neighboring FlhA<sub>C</sub> subunit in the FlhA<sub>C</sub> ring to inhibit the interaction of FlhA<sub>C</sub> with flagellar chaperones in complex with their cognate filament-type substrates during hook assembly. When the hook reaches its mature length of about 55 nm, an interaction between FliK<sub>C</sub> and FlhB<sub>C</sub> triggers a conformational rearrangement of the FlhA<sub>C</sub> ring so that FlhA<sub>L</sub> dissociates from the hydrophobic dimple and binds to the D1 and D3 domains of the neighboring FlhA<sub>C</sub> subunit, allowing the chaperones to bind to FlhA<sub>C</sub> to facilitate the export of their cognate substrates for filament assembly.
